# Supplementary material for: Polymeric membrane potentiometric sensors based on template-removal-free imprinted receptors for determination of antibiotics
Source: Royal Society of Chemistry journal article supplement (doi:10.1039/d4ay00263f), 2024-01-01
Supplement: d4ay00263f1.pdf [file d4ay00263f1.pdf]

Supporting Information for

**Polymeric membrane potentiometric sensors based on template-removal-free imprinted receptors for determination of antibiotics**

Xinyao Wang <sup>a, b</sup>, Guohua Cui <sup>a</sup>, Rongning Liang <sup>a, \*</sup> and Wei Qin <sup>a</sup>

<sup>a</sup> CAS Key Laboratory of Coastal Environmental Processes and Ecological Remediation, Yantai Institute of Coastal Zone Research (YIC), Chinese Academy of Sciences (CAS); Shandong Key Laboratory of Coastal Environmental Processes, YICCAS, Yantai Shandong 264003, P. R. China

<sup>b</sup> University of Chinese Academy of Sciences, Beijing, 100049, P. R. China

\* Corresponding author. Fax: +86-535-2109000

E-mail address: rnliang@yic.ac.cn

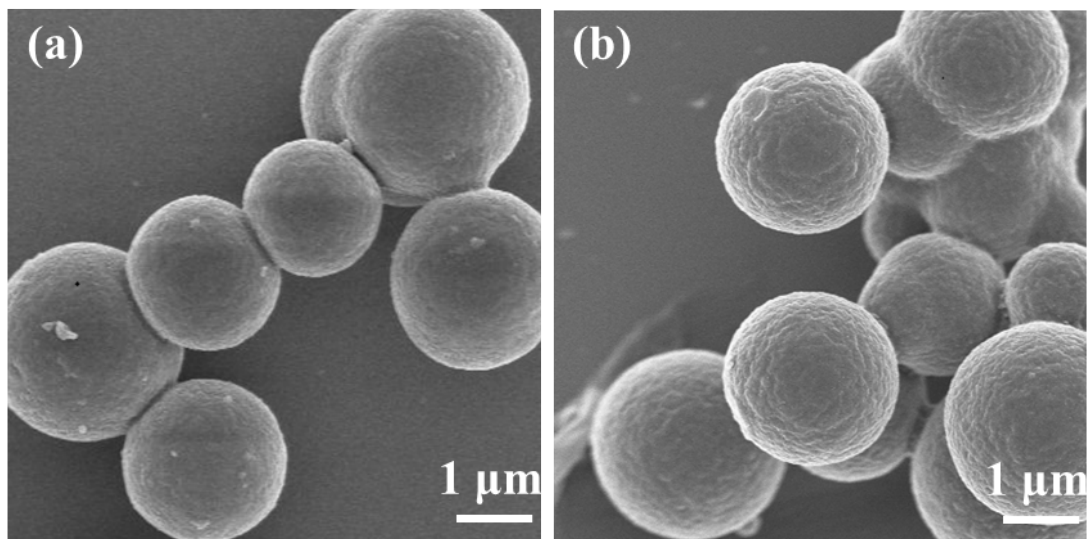

**Fig. S1.** SEM images of the traditional MIP beads with template removals by (a) stirred filtration extraction and (b) Soxhlet extraction.

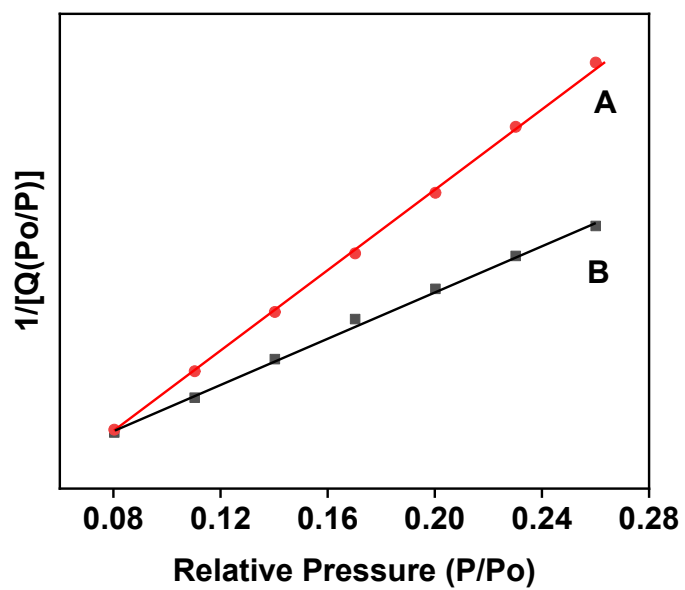

**Fig. S2.** BET surface area plots of the MIPs with template removal by (A) stirred filtration extraction and (B) Soxhlet extraction.

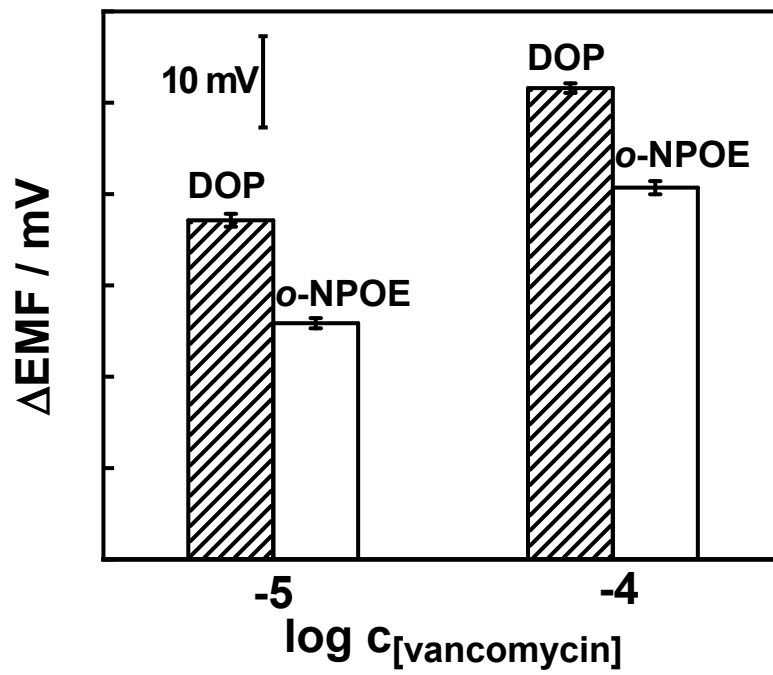

Fig. S3. Effect of the plasticizer on the potential response.

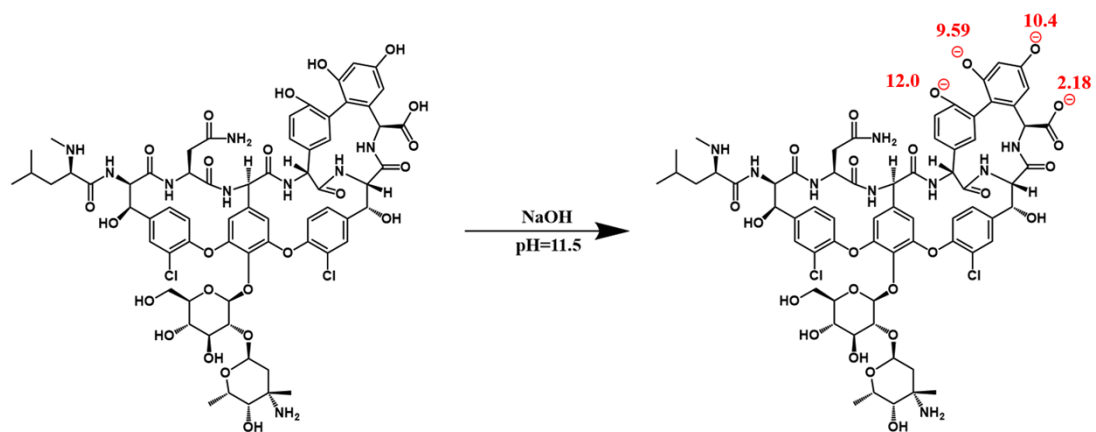

**Fig. S4.** Possible existing form of vancomycin in NaOH solution of pH 12.0.

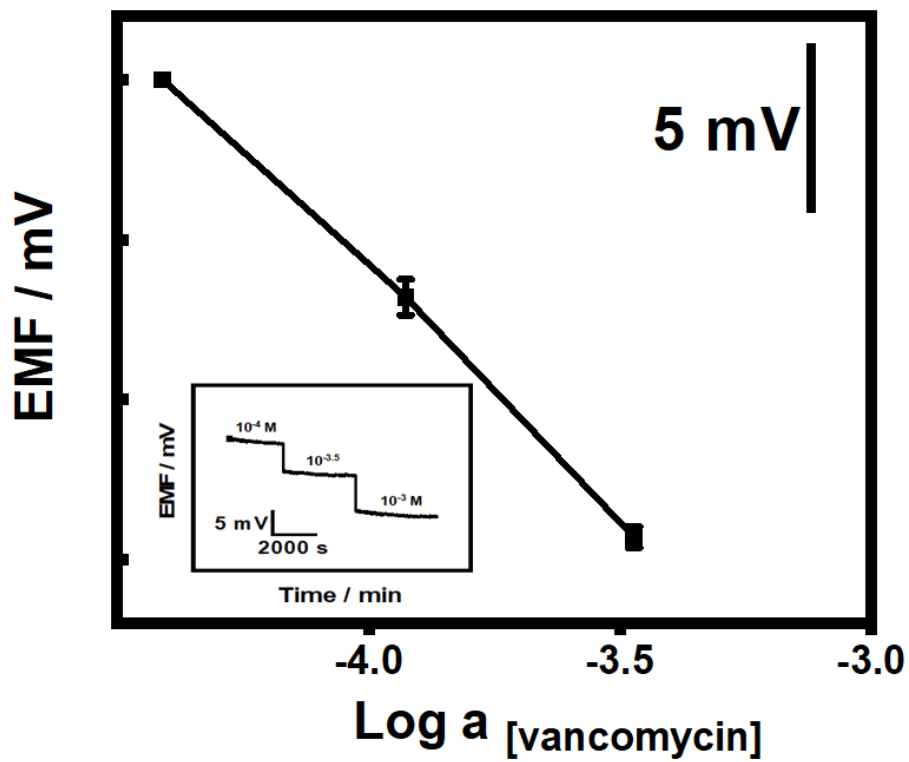

**Fig. S5.** The electrode responses at higher concentrations (higher than  $10^{-4}$  M). The inset shows the tracing of EMF vs. time.

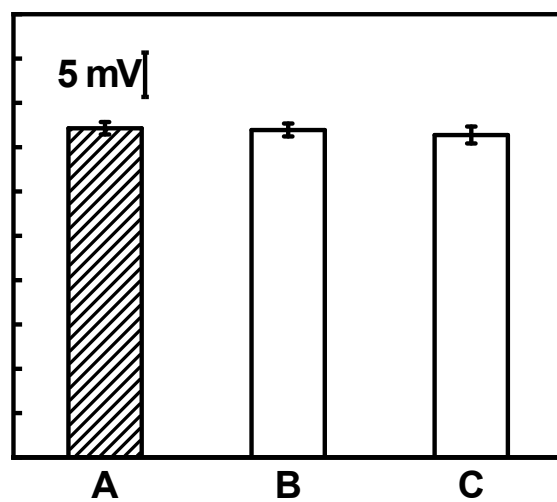

**Fig. S6.** The potential response of the sensor to  $10^{-5}$  M vancomycin ions in the presence of different interfering cations: A: control blank; B:  $10^{-3}$  M  $\text{Na}^+$ , C:  $10^{-3}$  M  $\text{K}^+$ .

**Table S1.** Performance comparison between a recently reported work and the present work.

|                                                            | MIP synthesis method            | Linear range                                                     | LOD ( $\mu\text{M}$ ) | Selectivity                                                                                                                                                                                                          |
|------------------------------------------------------------|---------------------------------|------------------------------------------------------------------|-----------------------|----------------------------------------------------------------------------------------------------------------------------------------------------------------------------------------------------------------------|
| Vancomycin selective electrode based on MIP (Reference 22) | Tedious template-removal steps  | $1.0 \times 10^{-5}$ to $1.0 \times 10^{-4}$ mol L <sup>-1</sup> | 6.6                   | Selectivity coefficients of the electrode over chloramphenicol, metronidazole, cefotaxime, ciprofloxacin, and amoxicillin were $6.98 \times 10^{-3}$ , $8.54 \times 10^{-3}$ , $> 1$ , $> 1$ , $> 1$ , respectively. |
| The present work                                           | Template-removal-free synthesis | $1.0 \times 10^{-7}$ to $1.0 \times 10^{-4}$ mol L <sup>-1</sup> | 0.025                 | No obvious interferences towards vancomycin detection from sulfamethoxazole, sulfamethazine, ciprofloxacin, ofloxacin, norfloxacin, sulfadiazine, and tetracycline at a same concentration of $10^{-5}$ M            |



**Table S2.** Application of the proposed method to determination of valinomycin in river water samples spiked with different amounts of valinomycin.

| Samples | Valinomycin ( $\mu\text{mol}\cdot\text{L}^{-1}$ ) |                 | Recovery (%) |
|---------|---------------------------------------------------|-----------------|--------------|
|         | Added                                             | Found           |              |
| 0       | 0                                                 | N.D             | -            |
| 1       | 5                                                 | $4.9 \pm 0.1$   | 98           |
| 2       | 50                                                | $52.3 \pm 0.5$  | 105          |
| 3       | 100                                               | $101.7 \pm 1.1$ | 102          |
